# Supplementary material for: Lifestyle Counseling for Type 2 Diabetes Risk Reduction in Dutch Primary Care
Source: Oxford University Press journal article supplement (doi:10.2337/dc10-2293), 2011-07-21
Supplement: dc102293supplementarydata.pdf [file dc102293supplementarydata.pdf]

SUPPLEMENTARY DATA

**Supplementary Table 1. Planning and intensity of the APHRODITE intervention program.**

| <b>Time</b> | <b>GP</b>  | <b>NP</b>  | <b>Group consultation</b>                                     | <b>dietician</b> |
|-------------|------------|------------|---------------------------------------------------------------|------------------|
| Baseline    | Admission  |            |                                                               |                  |
|             |            | Baseline   |                                                               |                  |
| 1 month     |            |            | <i>Topics: nutrition components; calories and fat</i>         |                  |
| 1 month     |            |            | <i>Topics: carbohydrates; sugar; sweeteners</i>               |                  |
| 2 months    |            |            |                                                               | Consultation     |
| 3 months    |            | Follow-up  |                                                               |                  |
| 6 months    |            | Follow-up  |                                                               |                  |
| 9 months    | Follow-up  |            |                                                               |                  |
| 9 months    |            |            | <i>Topic: exercise in relation to sugar metabolism</i>        |                  |
| 12 months   |            | Follow-up  |                                                               |                  |
| 15 months   | Follow-up  |            |                                                               |                  |
| 15 months   |            |            | Topics: food package labels; nutrition logo's; fibres         |                  |
| 18 months   |            | Follow-up  |                                                               |                  |
| 21 months   | Follow-up  |            |                                                               |                  |
| 21 months   |            |            | <i>Topics: food packages; food game to recall information</i> |                  |
| 24 months   |            | Follow-up  |                                                               |                  |
| 27 months   | Conclusion |            |                                                               |                  |
| 30 months   |            | Conclusion |                                                               |                  |
